# Supplementary material for: Assessing parallel gene histories in viral genomes
Source: PubMed Central journal article supplement (PMC4743424; doi:10.1186/s12862-016-0605-4), 2016-02-05
Supplement: 12862_2016_605_MOESM1_ESM.pdf [file 12862_2016_605_MOESM1_ESM.pdf]

## Supplementary material and methods

### Perform the alignment:

1. Download, both, nucleotides –*gene\_seqs\_nt.fas* (1)– and amino acid –*gene\_seqs\_aa.fas* (2)– gene sequences from the databases. Save the sequences of each of the genes in separated files.

#### **Example:**

*E1gene\_seq\_nt.fas* file only contains the gene E1 from the different organisms

> Organism 1

atggctgaaactgcaggtagctcggggcaggggggggagcttatatctgctttgaagccgactgtagcgactctgatacagaggtt.....

> Organism 2

atggacgacggtaaaccaggtactggacagtattctggatggtttatattgacagggaggctgaatgtaatgataatgatgtggagga.....

> Organism 3

atggcaaatgagaaaggtagcaattgggattcgggcttgggatgctcatatctgctgactgaggcagaatgcgaaagtgacaaagat.....

2. Perform the alignment for each of the amino acid files, with the MUSCLE software (online version: <http://www.ebi.ac.uk/Tools/msa/muscle/>; version for download: <http://www.drive5.com/muscle/downloads.htm>).

Input file: *gene\_seqs\_aa.fas* (1)

Output file: *gene\_seqs\_alin\_aa.fas* (3)

3. Perform the corresponding nucleotide alignments with the on-line software PAL2NAL (<http://www.bork.embl.de/pal2nal/>).

Input files: *gene\_seqs\_alin\_aa.fas* (3)  
*gene\_seqs\_nt.fas* (2)

Output file: *gene\_seqs\_alin\_nt.fas* (4)

4. Alignment pruning with Gblocks (version for download: <http://molevol.cmima.csic.es/castresana/Gblocks.html>).

Input file: *gene\_seqs\_alin\_nt.fas* (4)

Output file: *gene\_seqs\_alin\_gb\_nt.fas* (5)

Parameters:

- Minimum number of sequences for a conserved position: half of the sequences plus one.
- Minimum number of sequences for a flank position: the same number as the previous parameter.
- Maximum number of contiguous non-conserved positions: 12.
- Minimum length of a block: 6

- Allowed gap positions: all.

5. Gene concatenating with BioEdit software (version for download: <http://www.mbio.ncsu.edu/bioedit/bioedit.html>).

Input files: All *gene\_seqs\_alin\_gb\_nt.fas* (5) files

Output file: *concatenate\_seqs\_alin\_gb\_nt.fas* (6)

6. Translating nucleotide files into amino acid files with the Mega software (version for download: <http://www.megasoftware.net/>).

Input files: All *gene\_seqs\_alin\_gb\_nt.fas* (5) files  
*concatenate\_seqs\_alin\_gb\_nt.fas* (6)

Output files: All *gene\_seqs\_alin\_gb\_aa.fas* (7) files  
*concatenate\_seqs\_alin\_gb\_aa.fas* (8)

### Phylogenetic reconstruction:

1. Maximum likelihood phylogenetic reconstruction with RAxML software (version for download: <http://sco.h-its.org/exelixis/web/software/raxml/index.html>).

Input files: All *gene\_seqs\_alin\_gb\_nt.fas* (5) files  
*concatenate\_seqs\_alin\_gb\_nt.fas* (6)  
All *gene\_seqs\_alin\_gb\_aa.fas* (7) files  
*concatenate\_seqs\_alin\_gb\_aa.fas* (8)

Output files: All *Best\_tree\_gene\_seqs\_alin\_gb\_nt.fas* (9) files  
All *Best\_tree\_info\_gene\_seqs\_alin\_gb\_nt.fas* (10) files  
*Best\_tree\_concatenate\_seqs\_alin\_gb\_nt.fas* (11)  
*Best\_tree\_info\_concatenate\_seqs\_alin\_gb\_nt.fas* (12)  
All *Best\_tree\_gene\_seqs\_alin\_gb\_aa.fas* (13) files  
All *Best\_tree\_info\_gene\_seqs\_alin\_gb\_aa.fas* (14) files  
*Best\_tree\_concatenate\_seqs\_alin\_gb\_aa.fas* (15)  
*Best\_tree\_info\_concatenate\_seqs\_alin\_gb\_aa.fas* (16)

#### Parameters:

- `raxmlHPC -f a -s input_file -x 123 -# autoMRE -m substitution_model -d -n output_file`  
(Note: to obtain the variables `Weight_2nd_pos` and `Weight_3rd_pos` assign distinct models to the codon positions, create the `partition_file` with the following contents:  
DNA, gene1codon1 = 1-500\3  
DNA, gene1codon2 = 2-500\3  
DNA, gene1codon3 = 3-500\3  
and please add “-q partition\_file -M” in the command line).

The variables [Tree\\_length\\_nt](#) (mean of the partition Tree-Lengths), [Tree\\_length\\_aa](#) (mean of the partition Tree-Lengths), [Weight\\_2nd\\_pos](#) (ratio between Tree-Length of the 1st partition of the nucleotide trees and [Tree\\_length\\_nt](#)), and [Weight\\_3rd\\_pos](#) (ratio between Tree-Length of the 2nd partition of the nucleotide trees and [Tree\\_length\\_nt](#)) will be obtained from the files all *Best\_tree\_info\_gene\_seqs\_alin\_gb\_nt.fas* (10) files, and all *Best\_tree\_info\_gene\_seqs\_alin\_gb\_aa.fas* (14) files.

### Phylogeny tree comparison:

1. Distances comparison by K-score implemented in the Ktreedist software (version for download: <http://molevol.cmima.csic.es/castresana/Ktreedist.html>)

Input files: All *Best\_tree\_gene\_seqs\_alin\_gb\_nt.fas* (9) files  
All *Best\_tree\_gene\_seqs\_alin\_gb\_aa.fas* (13) files

Output: The *K\_score\_nt* and *K\_score\_aa* values.

2. Processing the *K*-score values using the Principal Coordinate Analysis (PCoA) implemented in the “vegan” and “ade4” R Packages (version for download: <http://www.r-project.org/>)

Input: A matrix with the *K*-score values. A matrix for nucleotides and another one for amino acids.

Output: The values of the first two dimensions of the PCoA will be considered the variables [TreeComp1\\_nt](#), [TreeComp2\\_nt](#), [TreeComp1\\_aa](#) and [TreeComp2\\_aa](#).

### Identification of Selective pressures:

1. Site-specific positive and purifying selection is measured with the Selecton web server (online version: <http://selecton.tau.ac.il/>).

Input files: All *Best\_tree\_gene\_seqs\_alin\_gb\_dist\_nt.fas* (17) files  
All *gene\_seqs\_alin\_gb\_nt.fas* (5) files

Output: The  $\omega = d_N/d_S$  ratio at the individual codon level

2. Measuring the central tendency of the  $\omega$  through the Huber M-estimator, implemented in the “MASS” R Packages (version for download: <http://www.r-project.org/>).

Input: The  $\omega = d_N/d_S$  ratio at the individual codon level

Output: The variable [Selection\\_per\\_pos](#) at the gene level

### Tree distances calculation:

1. Calculation of nucleotide and amino acid distances for all possible pairs for each gene and the concatenate sequence. It is performed through the RAxML software (version for download: <http://sco.h-its.org/exelixis/web/software/raxml/index.html>).

Input files: All *gene\_seqs\_alin\_gb\_nt.fas* (5) files  
*concatenate\_seqs\_alin\_gb\_nt.fas* (6)  
All *gene\_seqs\_alin\_gb\_aa.fas* (7) files  
*concatenate\_seqs\_alin\_gb\_aa.fas* (8)  
All *Best\_tree\_gene\_seqs\_alin\_gb\_nt.fas* (9) files  
*Best\_tree\_concatenate\_seqs\_alin\_gb\_nt.fas* (11)  
All *Best\_tree\_gene\_seqs\_alin\_gb\_aa.fas* (13) files  
*Best\_tree\_concatenate\_seqs\_alin\_gb\_aa.fas* (15)

Output files: All *Best\_tree\_gene\_seqs\_alin\_gb\_dist\_nt.fas* (17) files  
*Best\_tree\_concatenate\_seqs\_alin\_gb\_dist\_nt.fas* (18)  
All *Best\_tree\_gene\_seqs\_alin\_gb\_dist\_aa.fas* (19) files  
*Best\_tree\_concatenate\_seqs\_alin\_gb\_dist\_aa.fas* (20)

Parameters:

- `raxmlHPC -f x -s alignment_input_file -t Best_tree_input_file -m substitution_model -n output_file`  
(Note: please add “-q partition\_file” in the command line when it is necessary)

3. Normalising the nucleotide and amino acid distances respect to their corresponding concatenated. Subsequently, measuring the Huber M-estimator, implemented in the “MASS” R Packages (version for download: <http://www.r-project.org/>).

Input files: All *Best\_tree\_gene\_seqs\_alin\_gb\_dist\_nt.fas* (17) files  
*Best\_tree\_concatenate\_seqs\_alin\_gb\_dist\_nt.fas* (18)  
All *Best\_tree\_gene\_seqs\_alin\_gb\_dist\_aa.fas* (19) files  
*Best\_tree\_concatenate\_seqs\_alin\_gb\_dist\_aa.fas* (20)

Output: The variables `Norm_pwdist_nt` and `Norm_pwdist_aa`

### Identifying genes displaying similar evolutionary metrics:

Use de following variables: `Tree_length_nt`, `Tree_length_aa`, `Weight_2nd_pos`, `Weight_3rd_pos`  
`TreeComp1_nt`, `TreeComp2_nt`, `TreeComp1_aa`, `TreeComp2_aa`, `Selection_per_pos`  
`Norm_pwdist_nt` and `Norm_pwdist_aa`.

1. Standardise the variables and perform a Ward hierarchical clustering using the Euclidean distances through the R package “pvclust” (version for download: <http://www.r-project.org/>).
2. Use these same standardised variables to perform a principal component analysis (PCA) through the R package “stats” (version for download: <http://www.r-project.org/>).
