# Supplementary material for: Assessing parallel gene histories in viral genomes
Source: PubMed Central journal article supplement (PMC4743424; doi:10.1186/s12862-016-0605-4), 2016-02-05
Supplement: 12862_2016_605_MOESM2_ESM.pdf [file 12862_2016_605_MOESM2_ESM.pdf]

Table S1a

| TuMV name | Name of the first host from which the TuMV was isolated | GenBank ID |
|-----------|---------------------------------------------------------|------------|
| 2J        | <i>Brassica pekinensis</i>                              | AB093622   |
| 59J       | <i>Raphanus sativus</i>                                 | AB093620   |
| A102/11   | <i>Anemone coronaria</i>                                | AB093597   |
| A64       | <i>Anemone coronaria</i>                                | AB093599   |
| Al        | <i>Alliaria officinalis</i>                             | AB093598   |
| BZ1       | <i>Brassica oleracea</i>                                | AB093611   |
| C42J      | <i>Brassica rapa</i>                                    | AB093625   |
| Cal1      | <i>Calendula officinalis</i>                            | AB093601   |
| CDN1      | <i>Brassica napus</i>                                   | AB093610   |
| CHN12     | Not known                                               | AY090660   |
| CP845J    | <i>Calendula officinalis</i>                            | AB093614   |
| CZE1      | <i>Brassica oleracea</i>                                | AB093608   |
| DMJ       | <i>Raphanus sativus</i>                                 | AB093623   |
| HRD       | <i>Raphanus sativus</i>                                 | AB093627   |
| IS1       | <i>Allium ampeloprasum</i>                              | AB093602   |
| ITA7      | <i>Raphanus raphanistrum</i>                            | AB093600   |
| Ka1J      | <i>Brassica pekinensis</i>                              | AB093624   |
| KD32J     | <i>Raphanus sativus</i>                                 | AB093621   |
| KEN1      | <i>Brassica oleracea</i>                                | AB093605   |
| KYD81J    | <i>Raphanus sativus</i>                                 | AB093613   |
| NZ290     | <i>Brassica pekinensis</i>                              | AB093612   |
| PV0104    | <i>Lactuca sativa</i>                                   | AB093603   |
| PV376-Br  | <i>Brassica napus</i>                                   | AB093604   |
| Q-Ca      | <i>Brassica rapa</i>                                    | D10927     |
| RUS1      | <i>A Armoracia rusticana</i>                            | AB093606   |
| RUS2      | <i>Brassica napus</i>                                   | AB093607   |
| St48      | <i>Limonium sinuatum</i>                                | AB093596   |
| TW        | Not known                                               | AF394602   |
| UK1       | <i>Brassica napus</i>                                   | AF169561   |
| USA1      | <i>Brassica oleracea</i>                                | AB093609   |

Table S1b

| PV name | Name of the first host from which the PV was isolated | GenBank ID |
|---------|-------------------------------------------------------|------------|
| AaPV1   | <i>Alces alces</i>                                    | M15953     |
| BPV1    | <i>Bos taurus</i>                                     | X02346     |
| BPV7    | <i>Bos taurus</i>                                     | DQ217793   |
| BPV8    | <i>Bos taurus</i>                                     | DQ098913   |
| CcaPV1  | <i>Capreolus capreolus</i>                            | EF680235   |
| CcPV1   | <i>Caretta caretta</i>                                | EU493092   |
| ChPV1   | <i>Capra hircus</i>                                   | DQ091200   |
| CmPV1   | <i>Chelonia mydas</i>                                 | EU493091   |
| CPV1    | <i>Canis familiaris</i>                               | D55633     |
| CPV2    | <i>Canis familiaris</i>                               | AY722648   |
| CPV4    | <i>Canis familiaris</i>                               | EF584537   |
| CPV5    | <i>Canis familiaris</i>                               | FJ492743   |
| CPV6    | <i>Canis familiaris</i>                               | FJ492744   |
| CPV7    | <i>Canis familiaris</i>                               | FJ492742   |
| EcPV1   | <i>Equus caballus</i>                                 | AF498323   |
| EcPV2   | <i>Equus caballus</i>                                 | EU503122   |
| EdPV1   | <i>Erethizon dorsatum</i>                             | AY684126   |
| EePV1   | <i>Erinaceus europaeus</i>                            | FJ379293   |
| FcaPV1  | <i>Felis domesticus</i>                               | AF480454   |
| FcaPV2  | <i>Felis domesticus</i>                               | EU796884   |
| HPV6    | <i>Homo sapiens</i>                                   | X00203     |
| HPV10   | <i>Homo sapiens</i>                                   | X74465     |
| HPV13   | <i>Homo sapiens</i>                                   | X62843     |
| HPV16_C | <i>Homo sapiens</i>                                   | AF472509   |
| HPV18   | <i>Homo sapiens</i>                                   | X05015     |
| HPV24   | <i>Homo sapiens</i>                                   | U31782     |
| HPV26   | <i>Homo sapiens</i>                                   | X74472     |
| HPV31   | <i>Homo sapiens</i>                                   | J04353     |
| HPV32   | <i>Homo sapiens</i>                                   | X74475     |
| HPV36   | <i>Homo sapiens</i>                                   | U31785     |
| HPV38   | <i>Homo sapiens</i>                                   | U31787     |
| HPV39   | <i>Homo sapiens</i>                                   | M62849     |
| HPV40   | <i>Homo sapiens</i>                                   | X74478     |
| HPV41   | <i>Homo sapiens</i>                                   | X56147     |
| HPV44   | <i>Homo sapiens</i>                                   | U31788     |
| HPV45   | <i>Homo sapiens</i>                                   | X74479     |
| HPV50   | <i>Homo sapiens</i>                                   | U31790     |
| HPV54   | <i>Homo sapiens</i>                                   | AF436129   |
| HPV56   | <i>Homo sapiens</i>                                   | X74483     |
| HPV57   | <i>Homo sapiens</i>                                   | X55965     |
| HPV58   | <i>Homo sapiens</i>                                   | D90400     |
| HPV60   | <i>Homo sapiens</i>                                   | U31792     |
| HPV61   | <i>Homo sapiens</i>                                   | U31793     |
| HPV63   | <i>Homo sapiens</i>                                   | X70828     |
| HPV65   | <i>Homo sapiens</i>                                   | X70829     |
| HPV73   | <i>Homo sapiens</i>                                   | X94165     |
| HPV76   | <i>Homo sapiens</i>                                   | Y15174     |
| HPV80   | <i>Homo sapiens</i>                                   | Y15176     |
| HPV85   | <i>Homo sapiens</i>                                   | AF131950   |
| HPV87   | <i>Homo sapiens</i>                                   | AJ400628   |
| HPV90   | <i>Homo sapiens</i>                                   | AY057438   |
| HPV92   | <i>Homo sapiens</i>                                   | AF531420   |
| HPV96   | <i>Homo sapiens</i>                                   | AY382779   |
| HPV102  | <i>Homo sapiens</i>                                   | DQ080083   |
| HPV104  | <i>Homo sapiens</i>                                   | FM955840   |
| HPV109  | <i>Homo sapiens</i>                                   | EU541441   |
| LrPV1   | <i>Lynx rufus</i>                                     | AY904722   |
| MaPV1   | <i>Mesocricetus auratus</i>                           | E15111     |
| McPV2   | <i>Mastomys coucha</i>                                | DQ664501   |
| MfPV1   | <i>Macaca fascicularis</i>                            | EF028290   |
| MfPV3_b | <i>Macaca fascicularis</i>                            | EF591299   |
| MfPV6   | <i>Macaca fascicularis</i>                            | EF558840   |
| MfPV8   | <i>Macaca fascicularis</i>                            | EF558842   |
| MmiPV1  | <i>Micromys minutus</i>                               | DQ269468   |
| MnPV1   | <i>Mastomys natalensis</i>                            | U01834     |
| OaPV1   | <i>Ovis aries</i>                                     | U83594     |
| OcPV1   | <i>Oryctolagus cuniculus</i>                          | AF227240   |
| OvPV1   | <i>Odocoileus virginianus</i>                         | M11910     |
| PcPV1   | <i>Puma concolor</i>                                  | AY904723   |
| PlpPV1  | <i>Panthera leo persica</i>                           | AY904724   |
| PIPV1   | <i>Procyon lotor</i>                                  | AY763115   |
| PpPV1   | <i>Pan paniscus</i>                                   | X62844     |
| PtPV1   | <i>Pan troglodytes</i>                                | AF020905   |
| RaPV1   | <i>Rousettus aegyptiacus</i>                          | DQ366842   |
| RnPV1   | <i>Rattus norvegicus</i>                              | GQ180114   |
| RtPV1   | <i>Rangifer tarandus</i>                              | AF443292   |
| SfPV1   | <i>Sylvilagus floridanus</i>                          | K02708     |
| TmPV1   | <i>Trichechus manatus latirostris</i>                 | AY609301   |
| UuPV1   | <i>Uncia uncia</i>                                    | DQ180494   |
