# Supplementary material for: Assessing parallel gene histories in viral genomes
Source: PubMed Central journal article supplement (PMC4743424; doi:10.1186/s12862-016-0605-4), 2016-02-05

Figure S1

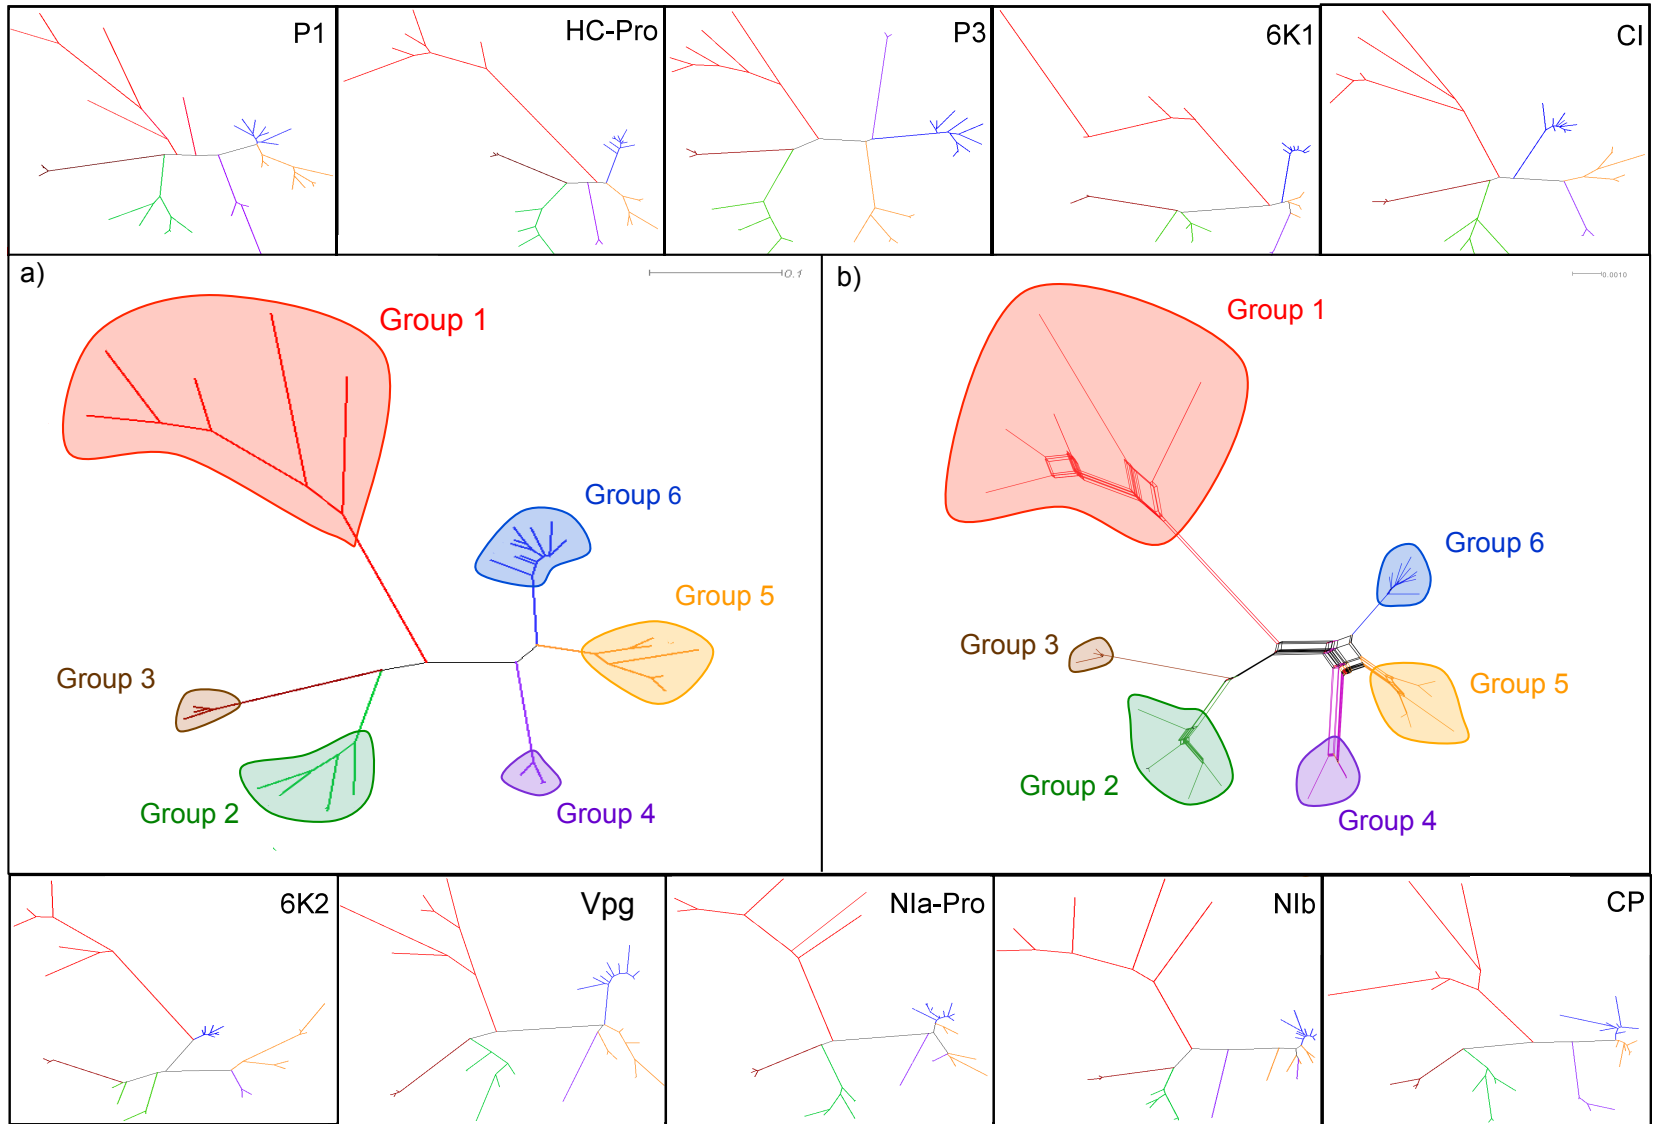

Supplement: 12862_2016_605_MOESM3_ESM.pdf [file 12862_2016_605_MOESM3_ESM.pdf]
