# Supplementary material for: Assessing parallel gene histories in viral genomes
Source: PubMed Central journal article supplement (PMC4743424; doi:10.1186/s12862-016-0605-4), 2016-02-05
Supplement: 12862_2016_605_MOESM4_ESM.pdf [file 12862_2016_605_MOESM4_ESM.pdf]

Table S2

a)

| TuMV               | Group 1               | Group 2               | Group 3 | Group 4 | Group 5 | Group 6 |
|--------------------|-----------------------|-----------------------|---------|---------|---------|---------|
| P1                 | 92(except St48_Italy) | 100                   | 100     | 100     | 88      | -       |
| HC-Pro             | 100                   | 100                   | 100     | 100     | 99      | 100     |
| P3                 | 100                   | 100                   | 100     | 100     | 100     | 98      |
| 6K1                | 82                    | 79(except ITA7_Italy) | 96      | 78      | -       | 87      |
| CI                 | 100                   | 100                   | 100     | 100     | 86      | 100     |
| 6K2                | 100                   | -                     | 99      | 78      | 86      | 74      |
| VPg                | 100                   | 88                    | 100     | -       | -       | 98      |
| NIa-Pro            | 100                   | 100                   | 99      | -       | -       | 43      |
| NIb                | 100                   | 99                    | 100     | -       | -       | 89      |
| CP                 | 100                   | 78                    | 97      | 100     | 53      | 53      |
| Concatenated genes | 100                   | 100                   | 100     | 100     | 92      | 100     |

b)

| PV                 | $\alpha+o$ | $\beta+\xi$     | $\lambda+\mu$         | $\delta+\theta$ |
|--------------------|------------|-----------------|-----------------------|-----------------|
| E6                 | -          | -               | -                     | 46              |
| E7                 | -          | -               | -                     | 60              |
| E1                 | 99         | 59              | 41                    | 99              |
| E2                 | 100        | 18(except PBV7) | 28                    | 91              |
| L2                 | 100        | -               | 66(except HPV41,EdPV) | 100             |
| L1                 | 100        | 66              | 86                    | 28              |
| Concatenated genes | 100        | 94              | 100                   | 100             |
