# Supplementary material for: Assessing parallel gene histories in viral genomes
Source: PubMed Central journal article supplement (PMC4743424; doi:10.1186/s12862-016-0605-4), 2016-02-05
Supplement: 12862_2016_605_MOESM5_ESM.pdf [file 12862_2016_605_MOESM5_ESM.pdf]

Table S3

a)

|         | Tree_length_nt | Weight_2nd_pos | Weight_3rd_pos | Tree_length_aa | TreeComp1_nt | TreeComp2_nt | TreeComp1_aa | TreeComp2_aa | Selection_per_pos | Norm_pwdist_nt | Norm_pwdist_aa |
|---------|----------------|----------------|----------------|----------------|--------------|--------------|--------------|--------------|-------------------|----------------|----------------|
| P1      | 2.689          | 0.178          | 0.643          | 2.209          | -0.141       | 0.013        | 0.297        | 0.045        | 0.287             | 1.121          | 2.988          |
| HC-Pro  | 2.861          | 0.019          | 0.898          | 0.370          | -0.202       | -0.250       | -0.014       | -0.055       | 0.009             | 1.430          | 0.451          |
| P3      | 2.518          | 0.082          | 0.772          | 1.305          | -0.098       | 0.093        | 0.048        | -0.156       | 0.044             | 1.431          | 2.356          |
| 6K1     | 2.825          | 0.002          | 0.955          | 0.161          | -0.414       | 0.109        | -0.103       | 0.041        | 0.008             | 1.355          | 0.386          |
| CI      | 1.896          | 0.030          | 0.906          | 0.267          | 0.100        | 0.009        | -0.006       | 0.031        | 0.008             | 0.881          | 0.388          |
| 6K2     | 2.040          | 0.050          | 0.810          | 0.761          | 0.137        | -0.154       | -0.069       | -0.020       | 0.033             | 1.171          | 1.534          |
| VPg     | 1.964          | 0.047          | 0.832          | 0.755          | 0.136        | 0.115        | -0.041       | 0.010        | 0.018             | 0.991          | 1.246          |
| Nla-Pro | 1.902          | 0.008          | 0.903          | 0.181          | 0.192        | 0.014        | -0.065       | 0.019        | 0.008             | 0.929          | 0.318          |
| Nlb     | 1.677          | 0.032          | 0.862          | 0.351          | 0.160        | 0.025        | -0.016       | 0.055        | 0.017             | 0.732          | 0.435          |
| CP      | 0.994          | 0.061          | 0.824          | 0.351          | 0.129        | 0.025        | -0.032       | 0.029        | 0.025             | 0.463          | 0.504          |

b)

|    | Tree_length_nt | Weight_2nd_pos | Weight_3rd_pos | Tree_length_aa | TreeComp1_nt | TreeComp2_nt | TreeComp1_aa | TreeComp2_aa | Selection_per_pos | Norm_pwdist_nt | Norm_pwdist_aa |
|----|----------------|----------------|----------------|----------------|--------------|--------------|--------------|--------------|-------------------|----------------|----------------|
| E6 | 41.669         | 0.145          | 0.617          | 39.400         | 1.958        | 0.245        | 2.405        | 0.025        | 0.249             | 1.434          | 2.267          |
| E7 | 48.047         | 0.182          | 0.525          | 53.339         | -2.311       | 0.163        | -2.848       | 0.005        | 0.542             | 1.058          | 1.620          |
| E1 | 30.867         | 0.135          | 0.645          | 31.396         | 0.030        | 0.408        | 0.048        | 0.535        | 0.167             | 0.926          | 0.874          |
| E2 | 34.740         | 0.177          | 0.510          | 42.068         | 0.106        | 0.342        | 0.265        | 0.510        | 0.262             | 0.872          | 1.264          |
| L2 | 38.391         | 0.143          | 0.633          | 37.141         | 0.151        | -0.889       | 0.222        | -0.975       | 0.169             | 1.136          | 1.194          |
| L1 | 35.224         | 0.100          | 0.747          | 23.151         | 0.067        | -0.270       | -0.092       | -0.099       | 0.068             | 1.044          | 0.589          |
